# Supplementary material
Source: Research Square preprint supplement (doi:10.21203/rs.3.rs-9308105/v1)
Supplement: Supplementary file 1 [file a9bb05782e06423d791c12a8.docx]

Appendix:Supplementary material

TableS1 Association between single, dimensional, and cumulative of ACEs and TG in adolescents

|  |  | TG | | | | | | |
| --- | --- | --- | --- | --- | --- | --- | --- | --- |
|  |  | *R*2 | *β* | *t* | *P* | *F* | *LLCI* | *ULCI* |
| Model 1 | Single adversity |  |  |  |  |  |  |  |
|  | Emotional neglect | 0.003 | 0.012 | 2.499 | 0.013 | 6.243 | 0.003 | 0.021 |
|  | Physical neglect | 0.002 | 0.023 | 2.225 | 0.026 | 4.952 | 0.003 | 0.044 |
|  | Emotional abuse | 0.000 | 0.007 | 0.797 | 0.425 | 0.636 | -0.010 | 0.023 |
|  | Physical abuse | 0.001 | 0.011 | 1.369 | 0.171 | 1.874 | -0.005 | 0.026 |
|  | Community violence | 0.001 | 0.014 | 1.170 | 0.242 | 1.368 | -0.009 | 0.037 |
|  | Peer bullying | 0.000 | 0.008 | 1.007 | 0.314 | 1.013 | -0.007 | 0.023 |
|  | Sexual abuse | 0.000 | -0.001 | -0.063 | 0.950 | 0.004 | -0.045 | 0.042 |
|  | Family dysfunction | 0.002 | -0.004 | -1.834 | 0.067 | 3.362 | -0.008 | 0.000 |
|  | Dimensional ACEs |  |  |  |  |  |  |  |
|  | Threat | 0.000 | 0.002 | 0.780 | 0.435 | 0.609 | -0.003 | 0.007 |
|  | Deprivation | 0.000 | 0.000 | 0.106 | 0.916 | 0.011 | -0.004 | 0.004 |
|  | Cumulative ACEs | 0.000 | 0.001 | 0.476 | 0.634 | 24.756 | -0.002 | 0.003 |
| Model 2 | Single adversity |  |  |  |  |  |  |  |
|  | Emotional neglect | 0.057 | 0.012 | 2.503 | 0.012 | 25.775 | 0.003 | 0.021 |
|  | Physical neglect | 0.057 | 0.027 | 2.625 | 0.009 | 25.908 | 0.007 | 0.047 |
|  | Emotional abuse | 0.055 | 0.013 | 1.563 | 0.118 | 24.967 | -0.003 | 0.029 |
|  | Physical abuse | 0.056 | 0.015 | 2.038 | 0.042 | 25.329 | 0.001 | 0.030 |
|  | Community violence | 0.055 | 0.013 | 1.118 | 0.264 | 24.714 | -0.010 | 0.036 |
|  | Peer bullying | 0.055 | 0.008 | 1.096 | 0.273 | 24.704 | -0.007 | 0.023 |
|  | Sexual abuse | 0.054 | -0.004 | -0.181 | 0.856 | 24.457 | -0.046 | 0.038 |
|  | Family dysfunction | 0.055 | -0.002 | -1.158 | 0.247 | 24.734 | -0.006 | 0.002 |
|  | Dimensional ACEs |  |  |  |  |  |  |  |
|  | Threat | 0.055 | 0.003 | 1.306 | 0.192 | 24.811 | -0.002 | 0.008 |
|  | Deprivation | 0.055 | 0.002 | 0.800 | 0.424 | 24.586 | -0.002 | 0.006 |
|  | Cumulative ACEs | 0.055 | 0.002 | 1.203 | 0.229 | 24.756 | -0.001 | 0.004 |

Model 1: Crude model; Model 2: Controlled for friend numbers, BMI, smoking and drinking days.

TableS2 Association between single, dimensional, and cumulative of ACEs and HDL-C in adolescents

|  |  | HDL-C | | | | | | |
| --- | --- | --- | --- | --- | --- | --- | --- | --- |
|  |  | *R*2 | *β* | *t* | *P* | *F* | *LLCI* | *ULCI* |
| Model 1 | Single adversity |  |  |  |  |  |  |  |
|  | Emotional neglect | 0.002 | -0.017 | -1.960 | 0.050 | 3.841 | -0.035 | 0.000 |
|  | Physical neglect | 0.001 | -0.034 | -1.770 | 0.177 | 3.133 | -0.072 | 0.004 |
|  | Emotional abuse | 0.002 | -0.029 | -1.829 | 0.068 | 3.344 | -0.059 | 0.002 |
|  | Physical abuse | 0.003 | -0.034 | -2.422 | 0.015 | 5.586 | -0.062 | -0.007 |
|  | Community violence | 0.001 | -0.033 | -1.507 | 0.132 | 2.272 | -0.075 | 0.010 |
|  | Peer bullying | 0.002 | -0.030 | -2.054 | 0.040 | 4.220 | -0.058 | -0.001 |
|  | Sexual abuse | 0.001 | -0.063 | -1.559 | 0.119 | 2.431 | -0.143 | 0.016 |
|  | Family dysfunction | 0.016 | -0.022 | -5.805 | 0.000 | 33.699 | -0.030 | -0.015 |
|  | Dimensional ACEs |  |  |  |  |  |  |  |
|  | Threat | 0.004 | -0.014 | -2.897 | 0.004 | 8.393 | -0.023 | -0.004 |
|  | Deprivation | 0.020 | -0.025 | -6.638 | 0.000 | 44.067 | -0.032 | -0.018 |
|  | Cumulative ACEs | 0.016 | -0.014 | -5.861 | 0.000 | 34.351 | -0.019 | -0.01 |
| Model 2 | Single adversity |  |  |  |  |  |  |  |
|  | Emotional neglect | 0.065 | -0.019 | -2.166 | 0.030 | 29.499 | -0.036 | -0.002 |
|  | Physical neglect | 0.065 | -0.044 | -2.349 | 0.019 | 29.676 | -0.081 | -0.007 |
|  | Emotional abuse | 0.064 | -0.042 | -2.766 | 0.006 | 30.131 | -0.072 | -0.012 |
|  | Physical abuse | 0.067 | -0.045 | -3.230 | 0.001 | 30.725 | -0.072 | -0.018 |
|  | Community violence | 0.064 | -0.040 | -1.871 | 0.062 | 29.245 | -0.081 | 0.002 |
|  | Peer bullying | 0.064 | -0.037 | -2.590 | 0.010 | 29.929 | -0.064 | -0.009 |
|  | Sexual abuse | 0.064 | -0.066 | -1.681 | 0.093 | 29.102 | -0.144 | 0.011 |
|  | Family dysfunction | 0.081 | -0.024 | -6.466 | 0.000 | 37.421 | -0.032 | -0.017 |
|  | Dimensional ACEs |  |  |  |  |  |  |  |
|  | Threat | 0.069 | -0.018 | -3.819 | 0.000 | 31.610 | -0.027 | -0.009 |
|  | Deprivation | 0.087 | -0.027 | -7.427 | 0.000 | 40.269 | -0.034 | -0.020 |
|  | Cumulative ACEs | 0.083 | -0.017 | -6.869 | 0.000 | 38.566 | -0.021 | -0.012 |

Model 1: Crude model; Model 2: Controlled for friend numbers, BMI, smoking and drinking days.

Table S3 Sex-specific association between exposure patterns of ACEs and TG in adolescents

| ACEs exposure patterns | | *N* | *Β value* | *SE value* | Wald*χ*2 *value* | 95%*CI* | | *P value* |
| --- | --- | --- | --- | --- | --- | --- | --- | --- |
| *LLCI* | *ULCI* |
| Total | Low ACEs Group | 1349 | reference |  |  |  |  |  |
|  | Moderate ACEs Group | 347 | 0.005 | 0.011 | 0.255 | -0.016 | 0.026 | 0.613 |
|  | High neglect/abuse/bully Group | 134 | 0.018 | 0.016 | 1.271 | -0.013 | 0.050 | 0.260 |
|  | High dysfunction Group | 301 | 0.025 | 0.011 | 5.015 | 0.003 | 0.047 | 0.025 |
|  |  |  |  |  |  |  |  |  |
| Male | Low ACEs Group | 798 | reference |  |  |  |  |  |
|  | Moderate ACEs Group | 197 | 0.004 | 0.015 | 0.091 | -0.024 | 0.033 | 0.763 |
|  | High neglect/abuse/bully Group | 54 | -0.003 | 0.026 | 0.011 | -0.053 | 0.048 | 0.917 |
|  | High dysfunction Group | 125 | 0.035 | 0.018 | 3.966 | 0.001 | 0.069 | 0.046 |
|  |  |  |  |  |  |  |  |  |
| Female | Low ACEs Group | 551 | reference |  |  |  |  |  |
|  | Moderate ACEs Group | 150 | 0.007 | 0.016 | 0.205 | -0.024 | 0.038 | 0.651 |
|  | High neglect/abuse/bully Group | 80 | 0.034 | 0.020 | 2.843 | -0.006 | 0.074 | 0.092 |
|  | High dysfunction Group | 176 | 0.020 | 0.015 | 1.940 | -0.008 | 0.049 | 0.164 |

Model 1: Crude model; Model 2: Controlled for friend numbers, BMI, smoking and drinking days.

Table S4 Sex-specific association between exposure patterns of ACEs and HDL-C in adolescents

| ACEs exposure patterns | | *N* | *Β value* | *SE value* | Wald*χ*2 *value* | 95%*CI* | | *P value* |
| --- | --- | --- | --- | --- | --- | --- | --- | --- |
| *LLCI* | *ULCI* |
| Total | Low ACEs Group | 1349 | reference |  |  |  |  |  |
|  | Moderate ACEs Group | 347 | -0.008 | 0.020 | 0.163 | -0.046 | 0.030 | 0.686 |
|  | High neglect/abuse/bully Group | 134 | -0.118 | 0.029 | 16.107 | -0.175 | 0.060 | ＜0.001 |
|  | High dysfunction Group | 301 | -0.107 | 0.021 | 26.653 | -0.147 | -0.066 | ＜0.001 |
|  |  |  |  |  |  |  |  |  |
| Male | Low ACEs Group | 798 | reference |  |  |  |  |  |
|  | Moderate ACEs Group | 197 | 0.003 | 0.023 | 0.021 | -0.042 | 0.049 | 0.884 |
|  | High neglect/abuse/bully Group | 54 | -0.038 | 0.041 | 0.853 | -0.118 | 0.042 | 0.356 |
|  | High dysfunction Group | 125 | -0.076 | 0.028 | 7.474 | -0.131 | -0.022 | 0.006 |
|  |  |  |  |  |  |  |  |  |
| Female | Low ACEs Group | 551 | reference |  |  |  |  |  |
|  | Moderate ACEs Group | 150 | -0.035 | 0.031 | 1.283 | -0.095 | 0.025 | 0.257 |
|  | High neglect/abuse/bully Group | 80 | -0.240 | 0.040 | 36.618 | -0.318 | -0.162 | ＜0.001 |
|  | High dysfunction Group | 176 | -0.193 | 0.029 | 45.319 | -0.250 | -0.137 | ＜0.001 |

Model 1: Crude model; Model 2: Controlled for friend numbers, BMI, number of smoking days in the past month and number of drinking days in the past month.

TableA1 Association between single, dimensional, and cumulative of ACEs and TG in adolescents

|  |  | TG | | | | | | |
| --- | --- | --- | --- | --- | --- | --- | --- | --- |
|  |  | *R*2 | *β* | *t* | *P** | *F* | *LLCI* | *ULCI* |
| Model 1 | Single adversity |  |  |  |  |  |  |  |
|  | Emotional neglect | 0.003 | 0.012 | 2.499 | 0.095 | 6.243 | 0.003 | 0.021 |
|  | Physical neglect | 0.002 | 0.023 | 2.225 | 0.143 | 4.952 | 0.003 | 0.044 |
|  | Emotional abuse | 0.000 | 0.007 | 0.797 | 0.532 | 0.636 | -0.010 | 0.023 |
|  | Physical abuse | 0.001 | 0.011 | 1.369 | 0.429 | 1.874 | -0.005 | 0.026 |
|  | Community violence | 0.001 | 0.014 | 1.170 | 0.429 | 1.368 | -0.009 | 0.037 |
|  | Peer bullying | 0.000 | 0.008 | 1.007 | 0.461 | 1.013 | -0.007 | 0.023 |
|  | Sexual abuse | 0.000 | -0.001 | -0.063 | 0.950 | 0.004 | -0.045 | 0.042 |
|  | Family dysfunction | 0.002 | -0.004 | -1.834 | 0.246 | 3.362 | -0.008 | 0.000 |
|  | Dimensional ACEs |  |  |  |  |  |  |  |
|  | Threat | 0.000 | 0.002 | 0.780 | 0.532 | 0.609 | -0.003 | 0.007 |
|  | Deprivation | 0.000 | 0.000 | 0.106 | 0.950 | 0.011 | -0.004 | 0.004 |
|  | Cumulative ACEs | 0.000 | 0.001 | 0.476 | 0.734 | 24.756 | -0.002 | 0.003 |
| Model 2 | Single adversity |  |  |  |  |  |  |  |
|  | Emotional neglect | 0.057 | 0.012 | 2.503 | 0.095 | 25.775 | 0.003 | 0.021 |
|  | Physical neglect | 0.057 | 0.027 | 2.625 | 0.095 | 25.908 | 0.007 | 0.047 |
|  | Emotional abuse | 0.055 | 0.013 | 1.563 | 0.371 | 24.967 | -0.003 | 0.029 |
|  | Physical abuse | 0.056 | 0.015 | 2.038 | 0.185 | 25.329 | 0.001 | 0.030 |
|  | Community violence | 0.055 | 0.013 | 1.118 | 0.429 | 24.714 | -0.010 | 0.036 |
|  | Peer bullying | 0.055 | 0.008 | 1.096 | 0.429 | 24.704 | -0.007 | 0.023 |
|  | Sexual abuse | 0.054 | -0.004 | -0.181 | 0.942 | 24.457 | -0.046 | 0.038 |
|  | Family dysfunction | 0.055 | -0.002 | -1.158 | 0.429 | 24.734 | -0.006 | 0.002 |
|  | Dimensional ACEs |  |  |  |  |  |  |  |
|  | Threat | 0.055 | 0.003 | 1.306 | 0.429 | 24.811 | -0.002 | 0.008 |
|  | Deprivation | 0.055 | 0.002 | 0.800 | 0.532 | 24.586 | -0.002 | 0.006 |
|  | Cumulative ACEs | 0.055 | 0.002 | 1.203 | 0.429 | 24.756 | -0.001 | 0.004 |

Note: *FDR adjusted P value.

TableA2 Association between single, dimensional, and cumulative of ACEs and HDL-C in adolescents

|  |  | HDL-C | | | | | | |
| --- | --- | --- | --- | --- | --- | --- | --- | --- |
|  |  | *R2* | *β* | *t* | *P** | *F* | *LLCI* | *ULCI* |
| Model 1 | Single adversity |  |  |  |  |  |  |  |
|  | Emotional neglect | 0.002 | -0.017 | -1.960 | 0.069 | 3.841 | -0.035 | 0.000 |
|  | Physical neglect | 0.001 | -0.034 | -1.770 | 0.177 | 3.133 | -0.072 | 0.004 |
|  | Emotional abuse | 0.002 | -0.029 | -1.829 | 0.083 | 3.344 | -0.059 | 0.002 |
|  | Physical abuse | 0.003 | -0.034 | -2.422 | 0.028 | 5.586 | -0.062 | -0.007 |
|  | Community violence | 0.001 | -0.033 | -1.507 | 0.138 | 2.272 | -0.075 | 0.010 |
|  | Peer bullying | 0.002 | -0.030 | -2.054 | 0.059 | 4.220 | -0.058 | -0.001 |
|  | Sexual abuse | 0.001 | -0.063 | -1.559 | 0.131 | 2.431 | -0.143 | 0.016 |
|  | Family dysfunction | 0.016 | -0.022 | -5.805 | 0.000 | 33.699 | -0.030 | -0.015 |
|  | Dimensional ACEs |  |  |  |  |  |  |  |
|  | Threat | 0.004 | -0.014 | -2.897 | 0.010 | 8.393 | -0.023 | -0.004 |
|  | Deprivation | 0.020 | -0.025 | -6.638 | 0.000 | 44.067 | -0.032 | -0.018 |
|  | Cumulative ACEs | 0.016 | -0.014 | -5.861 | 0.000 | 34.351 | -0.019 | -0.010 |
| Model 2 | Single adversity |  |  |  |  |  |  |  |
|  | Emotional neglect | 0.065 | -0.019 | -2.166 | 0.047 | 29.499 | -0.036 | -0.002 |
|  | Physical neglect | 0.065 | -0.044 | -2.349 | 0.032 | 29.676 | -0.081 | -0.007 |
|  | Emotional abuse | 0.064 | -0.042 | -2.766 | 0.013 | 30.131 | -0.072 | -0.012 |
|  | Physical abuse | 0.067 | -0.045 | -3.230 | 0.003 | 30.725 | -0.072 | -0.018 |
|  | Community violence | 0.064 | -0.040 | -1.871 | 0.080 | 29.245 | -0.081 | 0.002 |
|  | Peer bullying | 0.064 | -0.037 | -2.590 | 0.020 | 29.929 | -0.064 | -0.009 |
|  | Sexual abuse | 0.064 | -0.066 | -1.681 | 0.108 | 29.102 | -0.144 | 0.011 |
|  | Family dysfunction | 0.081 | -0.024 | -6.466 | 0.000 | 37.421 | -0.032 | -0.017 |
|  | Dimensional ACEs |  |  |  |  |  |  |  |
|  | Threat | 0.069 | -0.018 | -3.819 | 0.000 | 31.610 | -0.027 | -0.009 |
|  | Deprivation | 0.087 | -0.027 | -7.427 | 0.000 | 40.269 | -0.034 | -0.020 |
|  | Cumulative ACEs | 0.083 | -0.017 | -6.869 | 0.000 | 38.566 | -0.021 | -0.012 |

Note: *FDR adjusted P value

Table A3 Associations between single, dimensional, and cumulative of ACEs and TG/HDL-C ratio in adolescents

| Variables | | Total | |  | Male | |  | Female | |
| --- | --- | --- | --- | --- | --- | --- | --- | --- | --- |
| *β* | *t* |  | *β* | *t* |  | *β* | *t* |
| Model 1 | Single adversity |  |  |  |  |  |  |  |  |
|  | Emotional neglect | 0.017 | 2.697** |  | 0.012 | 1.358 |  | 0.027 | 2.916** |
|  | Physical neglect | 0.034 | 2.479** |  | 0.029 | 1.618 |  | 0.039 | 1.856* |
|  | Emotional abuse | 0.016 | 1.416 |  | 0.007 | 0.468 |  | 0.029 | 1.718 |
|  | Physical abuse | 0.022 | 2.120* |  | 0.002 | 0.158 |  | 0.048 | 2.969** |
|  | Community violence | 0.025 | 1.589 |  | 0.016 | 0.912 |  | 0.022 | 0.698 |
|  | Peer bullying | 0.018 | 1.695 |  | 0.007 | 0.529 |  | 0.030 | 1.938* |
|  | Sexual abuse | 0.018 | 0.631 |  | -0.020 | -0.552 |  | 0.084 | 1.648 |
|  | Family dysfunction | 0.003 | 0.959 |  | 0.000 | -0.006 |  | 0.009 | 1.412 |
|  | Dimensional ACEs |  |  |  |  |  |  |  |  |
|  | Threat | 0.006 | 1.872 |  | 0.001 | 0.268 |  | 0.014 | 2.610** |
|  | Deprivation | 0.008 | 2.784** |  | 0.004 | 1.065 |  | 0.013 | 3.038** |
|  | Cumulative ACEs | 0.005 | 2.802** |  | 0.002 | 0.833 |  | 0.016 | 2.484** |
| Model 2 | Single adversity |  |  |  |  |  |  |  |  |
|  | Emotional neglect | 0.017 | 2.804** |  | 0.013 | 1.617 |  | 0.027 | 2.908** |
|  | Physical neglect | 0.041 | 3.065** |  | 0.038 | 2.184 |  | 0.044 | 2.100* |
|  | Emotional abuse | 0.026 | 2.416** |  | 0.020 | 1.370 |  | 0.037 | 2.209* |
|  | Physical abuse | 0.030 | 3.003** |  | 0.015 | 1.212 |  | 0.049 | 3.128** |
|  | Community violence | 0.026 | 1.723 |  | 0.021 | 1.203 |  | 0.027 | 0.875 |
|  | Peer bullying | 0.020 | 1.983* |  | 0.011 | 0.831 |  | 0.031 | 2.011* |
|  | Sexual abuse | 0.017 | 0.594 |  | -0.012 | -0.369 |  | 0.084 | 1.655 |
|  | Family dysfunction | 0.005 | 1.759 |  | 0.003 | 0.800 |  | 0.007 | 1.648 |
|  | Dimensional ACEs |  |  |  |  |  |  |  |  |
|  | Threat | 0.009 | 2.677** |  | 0.005 | 1.176 |  | 0.016 | 2.903** |
|  | Deprivation | 0.010 | 3.671** |  | 0.007 | 1.990 |  | 0.014 | 3.309** |
|  | Cumulative ACEs | 0.007 | 3.804** |  | 0.004 | 1.916 |  | 0.010 | 3.686** |

Note: *FDR adjusted P value.
